# Supplementary material for: Correction: genetic algorithm learning as a robust approach to RNA editing site site prediction
Source: PubMed Central journal article supplement (PMC1569880; doi:10.1186/1471-2105-7-406), 2006-09-06
Supplement: 1471-2105-7-406-S4.pdf [file 1471-2105-7-406-S4.pdf]

## Values for GA Variables

We derived values for each of the variables utilized in our GA by estimating frequencies from the training data sets. These data were derived from the *A. thaliana* mitochondrial genome data. Each variable listed here corresponds to one of the six variables discussed in the text and shown in Figure 1.

Hydrophobicity values were based on the frequency with which an edited codon yielded a known hydrophobic amino acid. For example, 34% of all edited codons yielded a serine, so the value for serine would be 0.34 as shown below.

### Hydrophobicity Values

| <u>Amino acid</u> | <u>Value</u> |
|-------------------|--------------|
| S                 | 0.3411       |
| P                 | 0.2670       |
| R                 | 0.1505       |
| L                 | 0.0729       |
| H                 | 0.0565       |
| I                 | 0.0305       |
| A                 | 0.0117       |
| V                 | 0.0071       |
| C                 | 0.0024       |
| Y                 | 0.0024       |
| Q                 | 0.0024       |
| D                 | 0.0024       |

Amino acid transition probabilities were calculated based on the frequency of finding an amino acid in a transcript post-editing compared with pre-editing. The values below represent the frequency seen in the training data pre- and post-editing. Some amino acids were never edited in our data sets, and these have no entries in the post-editing portion of the table. Other amino acids were edited to more than one amino acid as shown by double entries below.

## Amino Acid Transition Probabilities

---

| Pre-edit<br>Amino acid | Post-edit<br>Amino acid | Transition<br>Probability |
|------------------------|-------------------------|---------------------------|
| A                      | A                       | 0.00234741784037559       |
|                        | V                       | 0.0140845070422535        |
| F                      | F                       | 0.0234741784037559        |
|                        | S                       | 0.0117370892018779        |
| T                      | F                       | 0.115023474178404         |
|                        | L                       | 0.211267605633803         |
|                        | M                       | 0.00469483568075117       |
| P                      | T                       | 0.00704225352112676       |
|                        | I                       | 0.0164319248826291        |
|                        | F                       | 0.0187793427230047        |
|                        | S                       | 0.0633802816901408        |
| Y                      | P                       | 0.00704225352112676       |
|                        | L                       | 0.199530516431925         |
|                        | Y                       | 0.00234741784037559       |
| V                      | V                       | 0.00704225352112676       |
| H                      | Y                       | 0.0539906103286385        |
| Q                      | *                       | 0.00469483568075117       |
| D                      | D                       | 0.00234741784037559       |
| I                      | I                       | 0.0211267605633803        |
|                        | W                       | 0.0610328638497653        |
| R                      | C                       | 0.0751173708920188        |
|                        | R                       | 0.00234741784037559       |
|                        | *                       | 0.00234741784037559       |
| G                      | G                       | 0.00234741784037559       |
| L                      | F                       | 0.0422535211267606        |
|                        | L                       | 0.028169014084507         |

Codon transition probabilities were estimated from the training data in a similar manner as the amino acid transition probabilities. These are listed below for each pre-edit codon and its corresponding post-edit versions.

### Codon Transition Probabilities

| Pre-edit codon | Post-edit codon | Transition Probability |
|----------------|-----------------|------------------------|
| GCC            | GTT             | 0.00234741784037559    |
| CTT            | TTT             | 0.028169014084507      |
| GGA            | GGA             | 0.00469483568075117    |
| GTC            | GTC             | 0.00234741784037559    |
| TCA            | TTA             | 0.117370892018779      |
| CGA            | TGA             | 0.00234741784037559    |
| ATT            | ATT             | 0.00704225352112676    |
| TAT            | TAT             | 0.00234741784037559    |
| TAC            | TAC             | 0.00234741784037559    |
| ACA            | ATA             | 0.00469483568075117,   |
|                | ACA             | 0.00234741784037559    |
| TCG            | TTG             | 0.0985915492957746     |
| ACT            | ATT             | 0.00938967136150235    |
| CAA            | TAA             | 0.00234741784037559    |
| CCG            | TTG             | 0.0140845070422535,    |
|                | TCG             | 0.0117370892018779,    |
|                | CTG             | 0.0352112676056338     |
| CTG            | TTG             | 0.00469483568075117,   |
|                | CTG             | 0.00234741784037559    |
| GGT            | GGT             | 0.00704225352112676    |
| GCA            | GTA             | 0.00234741784037559    |
| GTG            | GTG             | 0.00234741784037559    |
| TCC            | TTT             | 0.00469483568075117,   |
|                | TTC             | 0.0328638497652582     |
| TTT            | TTT             | 0.00234741784037559    |
| CAC            | TAC             | 0.0140845070422535     |
| CGT            | CGT             | 0.00234741784037559,   |
|                | TGT             | 0.0586854460093897     |
| CAT            | CAT             | 0.00234741784037559,   |

|     |     |                      |
|-----|-----|----------------------|
|     | TAT | 0.039906103286385    |
| CGG | TGG | 0.0610328638497653   |
| ATA | ATA | 0.00469483568075117  |
| ACC | ACC | 0.00234741784037559, |
|     | ATC | 0.00234741784037559  |
| CCC | TCC | 0.00704225352112676, |
|     | CCC | 0.00234741784037559, |
|     | TCT | 0.00234741784037559, |
|     | TTC | 0.00469483568075117, |
|     | CTC | 0.00938967136150235  |
| TTA | TTA | 0.00234741784037559  |
| CCA | TCA | 0.0117370892018779,  |
|     | CTA | 0.068075117370892,   |
|     | TTA | 0.0187793427230047   |
| CTA | TTA | 0.0140845070422535   |
| GAT | GAT | 0.00234741784037559  |
| TCT | TTT | 0.0751173708920188,  |
|     | TCT | 0.00704225352112676  |
| CTC | TTT | 0.00469483568075117, |
|     | CTT | 0.00234741784037559, |
|     | TTC | 0.00938967136150235  |
| CGC | TGC | 0.0234741784037559   |
| TTG | TTG | 0.00234741784037559  |
| GCG | GTG | 0.00469483568075117  |
| GGC | GGC | 0.00234741784037559  |
| GAA | GAA | 0.00234741784037559  |
| CAG | CAG | 0.00234741784037559, |
|     | TAG | 0.00234741784037559  |
| GCT | GCT | 0.00234741784037559, |
|     | GTT | 0.00234741784037559  |
| CCT | TTT | 0.0140845070422535,  |
|     | CTT | 0.0539906103286385,  |
|     | TCT | 0.0328638497652582   |
| ACG | ATG | 0.00469483568075117  |
| AAA | AAA | 0.00469483568075117  |
| ATG | ATG | 0.00704225352112676  |
| GTA | GTA | 0.00234741784037559  |

The frequency of an edit occurring in each of the three codon positions is listed below.

**Codon Position**

| <b>First Position</b> | <b>Second Position</b> | <b>Third Position</b> |
|-----------------------|------------------------|-----------------------|
| 0.349                 | 0.535                  | 0.116                 |

The frequency with which each of the four nucleotides occur in the -1 position with respect to the edited C is listed below.

**-1 Nucleotide**

| <b>A</b> | <b>C</b> | <b>G</b> | <b>U</b> |
|----------|----------|----------|----------|
| 0.040    | 0.305    | 0.024    | 0.631    |

Nucleotide frequencies in the +1 position, immediately downstream of the edited C are listed here.

**+1 Nucleotide**

| <b>A</b> | <b>C</b> | <b>G</b> | <b>U</b> |
|----------|----------|----------|----------|
| 0.29     | 0.162    | 0.325    | 0.223    |

## Estimating Posterior Probabilities for REGAL Predictions

We used the false positive and false negative rates to estimate the posterior probability that a given prediction by REGAL is true. Below we report the false positive and false negative rates for the range of GA scores from 0 to 60,000.

| <u>GA Score</u> | <u>False positive rate</u> | <u>False negative rate</u> |
|-----------------|----------------------------|----------------------------|
| 0.000           | 1                          | 0                          |
| 500.000         | 1                          | 0                          |
| 1000.000        | 1                          | 0                          |
| 1500.000        | 1                          | 0                          |
| 2000.000        | 1                          | 0                          |
| 2500.000        | 1                          | 0                          |
| 3000.000        | 1                          | 0                          |
| 3500.000        | 1                          | 0                          |
| 4000.000        | 1                          | 0                          |
| 4500.000        | 1                          | 0                          |
| 5000.000        | 1                          | 0                          |
| 5500.000        | 1                          | 0                          |
| 6000.000        | 1                          | 0                          |
| 6500.000        | 1                          | 0                          |
| 7000.000        | 0.981                      | 0                          |
| 7500.000        | 0.977                      | 0                          |
| 8000.000        | 0.974                      | 0                          |
| 8500.000        | 0.971                      | 0                          |
| 9000.000        | 0.948                      | 0                          |
| 9500.000        | 0.919                      | 0.003                      |
| 10000.000       | 0.91                       | 0.003                      |
| 10500.000       | 0.884                      | 0.006000000000000001       |
| 11000.000       | 0.874                      | 0.006000000000000001       |
| 11500.000       | 0.813                      | 0.01                       |
| 12000.000       | 0.806                      | 0.01                       |
| 12500.000       | 0.729                      | 0.019                      |
| 13000.000       | 0.674                      | 0.019                      |
| 13500.000       | 0.668                      | 0.019                      |
| 14000.000       | 0.603                      | 0.023                      |

|           |       |                     |
|-----------|-------|---------------------|
| 14500.000 | 0.587 | 0.026               |
| 15000.000 | 0.558 | 0.035               |
| 15500.000 | 0.542 | 0.035               |
| 16000.000 | 0.487 | 0.045               |
| 16500.000 | 0.487 | 0.048               |
| 17000.000 | 0.477 | 0.048               |
| 17500.000 | 0.465 | 0.052               |
| 18000.000 | 0.448 | 0.05800000000000001 |
| 18500.000 | 0.445 | 0.06100000000000001 |
| 19000.000 | 0.439 | 0.06499999999999999 |
| 19500.000 | 0.429 | 0.06799999999999999 |
| 20000.000 | 0.426 | 0.1                 |
| 20500.000 | 0.394 | 0.1                 |
| 21000.000 | 0.381 | 0.1                 |
| 21500.000 | 0.377 | 0.1                 |
| 22000.000 | 0.377 | 0.1                 |
| 22500.000 | 0.374 | 0.1                 |
| 23000.000 | 0.374 | 0.1                 |
| 23500.000 | 0.355 | 0.106               |
| 24000.000 | 0.339 | 0.123               |
| 24500.000 | 0.335 | 0.129               |
| 25000.000 | 0.335 | 0.129               |
| 25500.000 | 0.329 | 0.139               |
| 26000.000 | 0.313 | 0.161               |
| 26500.000 | 0.313 | 0.174               |
| 27000.000 | 0.297 | 0.174               |
| 27500.000 | 0.297 | 0.174               |
| 28000.000 | 0.287 | 0.187               |
| 28500.000 | 0.287 | 0.187               |
| 29000.000 | 0.268 | 0.197               |
| 29500.000 | 0.268 | 0.197               |
| 30000.000 | 0.194 | 0.261               |
| 30500.000 | 0.194 | 0.261               |
| 31000.000 | 0.181 | 0.274               |
| 31500.000 | 0.177 | 0.284               |
| 32000.000 | 0.174 | 0.284               |
| 32500.000 | 0.152 | 0.352               |
| 33000.000 | 0.1   | 0.429               |

|           |       |       |
|-----------|-------|-------|
| 33500.000 | 0.1   | 0.484 |
| 34000.000 | 0.1   | 0.484 |
| 34500.000 | 0.1   | 0.484 |
| 35000.000 | 0.074 | 0.626 |
| 35500.000 | 0.074 | 0.639 |
| 36000.000 | 0.026 | 0.774 |
| 36500.000 | 0.026 | 0.774 |
| 37000.000 | 0.026 | 0.774 |
| 37500.000 | 0.026 | 0.774 |
| 38000.000 | 0.026 | 0.774 |
| 38500.000 | 0.026 | 0.774 |
| 39000.000 | 0.026 | 0.774 |
| 39500.000 | 0.026 | 0.774 |
| 40000.000 | 0.026 | 0.774 |
| 40500.000 | 0.026 | 0.774 |
| 41000.000 | 0.026 | 0.774 |
| 41500.000 | 0.026 | 0.774 |
| 42000.000 | 0.026 | 0.774 |
| 42500.000 | 0.026 | 0.774 |
| 43000.000 | 0.026 | 0.774 |
| 43500.000 | 0.026 | 0.774 |
| 44000.000 | 0.026 | 0.774 |
| 44500.000 | 0.026 | 0.774 |
| 45000.000 | 0.026 | 0.774 |
| 45500.000 | 0.019 | 0.9   |
| 46000.000 | 0.019 | 0.9   |
| 46500.000 | 0     | 1     |
| 47000.000 | 0     | 1     |
| 47500.000 | 0     | 1     |
| 48000.000 | 0     | 1     |
| 48500.000 | 0     | 1     |
| 49000.000 | 0     | 1     |
| 49500.000 | 0     | 1     |
| 50000.000 | 0     | 1     |
| 50500.000 | 0     | 1     |
| 51000.000 | 0     | 1     |
| 51500.000 | 0     | 1     |
| 52000.000 | 0     | 1     |



|           |   |   |
|-----------|---|---|
| 52500.000 | 0 | 1 |
| 53000.000 | 0 | 1 |
| 53500.000 | 0 | 1 |
| 54000.000 | 0 | 1 |
| 54500.000 | 0 | 1 |
| 55000.000 | 0 | 1 |
| 55500.000 | 0 | 1 |
| 56000.000 | 0 | 1 |
| 56500.000 | 0 | 1 |
| 57000.000 | 0 | 1 |
| 57500.000 | 0 | 1 |
| 58000.000 | 0 | 1 |
| 58500.000 | 0 | 1 |
| 59000.000 | 0 | 1 |
| 59500.000 | 0 | 1 |
| 60000.000 | 0 | 1 |
